# Supplementary material
Source: PubMed Central journal article supplement (PMC5672620)
Supplement: Supp_Table1.pdf [file Supp_Table1.pdf]

SUPPLEMENTARY TABLE S1. THYROID TESTING ASSAY DATES AND REFERENCE RANGES

| <i>Assay</i> | <i>Laboratory</i> | <i>Method</i>           | <i>Start date</i> | <i>End date</i> | <i>Lower limit</i> | <i>Upper limit</i> |
|--------------|-------------------|-------------------------|-------------------|-----------------|--------------------|--------------------|
| <i>TSH</i>   |                   |                         |                   |                 |                    |                    |
| 8401         | Nichols           | Chemiluminescence       | 2003              | 2005            | 0.5 mIU/L          | 4.7 mIU/L          |
| 84021        | Harbor Hospital   | Vista-Chemiluminescence | 2005              | 2011            | 0.35 mIU/L         | 5.5 mIU/L          |
| 84022        | Harbor Hospital   | Vista-Chemiluminescence | 2011              | present         | 0.4 mIU/L          | 4.0 mIU/L          |
| <i>fT4</i>   |                   |                         |                   |                 |                    |                    |
| 8901         | Nichols           | Radio-immunoassay       | 2003              | 2005            | 0.6 ng/dL          | 1.8 ng/dL          |
| 89021        | Harbor Hospital   | Vista-Chemiluminescence | 1999              | 2004            | 0.71 ng/dL         | 1.85 ng/dL         |
| 89022        | Harbor Hospital   | Vista-Chemiluminescence | 2004              | 2011            | 0.9 ng/dL          | 1.8 ng/dL          |
| 89023        | Harbor Hospital   | Vista-Chemiluminescence | 2011              | present         | 0.76 ng/dL         | 1.46 ng/dL         |
| <i>fT3</i>   |                   |                         |                   |                 |                    |                    |
| 88021        | Harbor Hospital   | Vista-Chemiluminescence | 2005              | 2011            | 1.8 pg/mL          | 4.2 pg/mL          |
| 88022        | Harbor Hospital   | Vista-Chemiluminescence | 2011              | present         | 2.18 pg/mL         | 3.98 pg/mL         |
